# Supplementary material for: Effective disproportionation of SiO induced by Na2CO3 and improved cycling stability via PDA-based carbon coating as anode materials for Li-ion batteries
Source: Royal Society of Chemistry journal article supplement (doi:10.1039/d3dt02841k), 2023-01-01
Supplement: d3dt02841k1.pdf [file d3dt02841k1.pdf]

## Supporting Information

**Effective disproportionation of SiO induced by  $\text{Na}_2\text{CO}_3$  and improved cycling stability via PDA-based carbon coating as anode materials for Li-ion batteries**

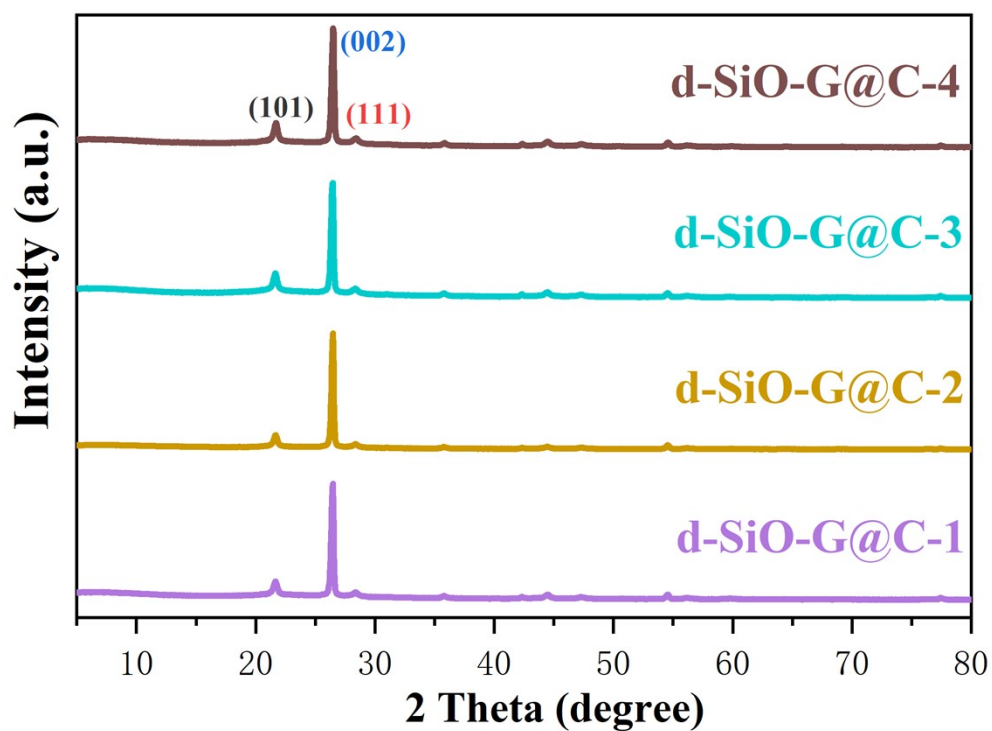

**Fig. S1** XRD patterns of d-SiO-G@C materials.

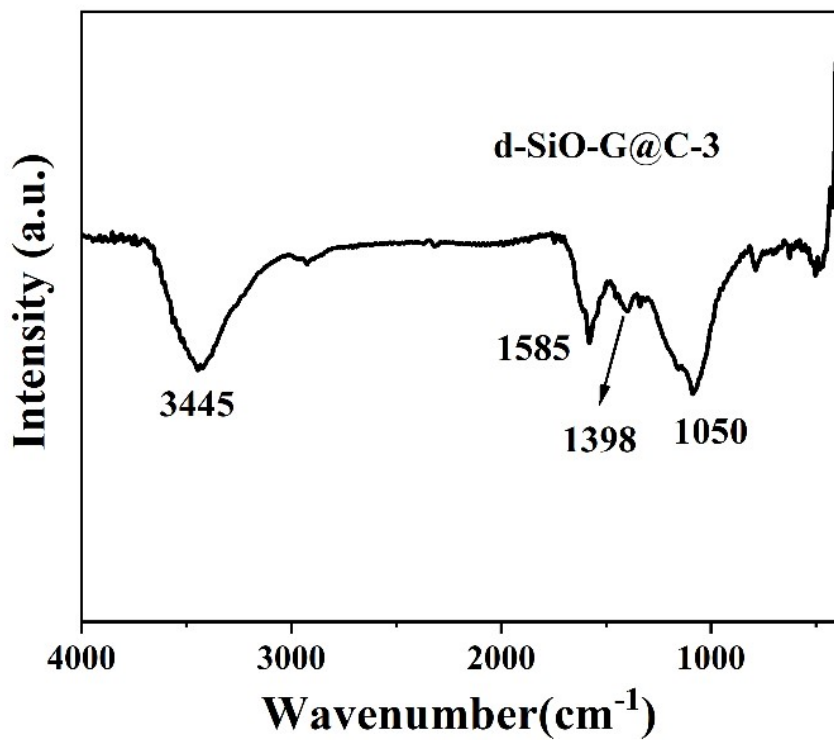

Fig. S2 FTIR spectra of d-SiO-G@C-3 composite.

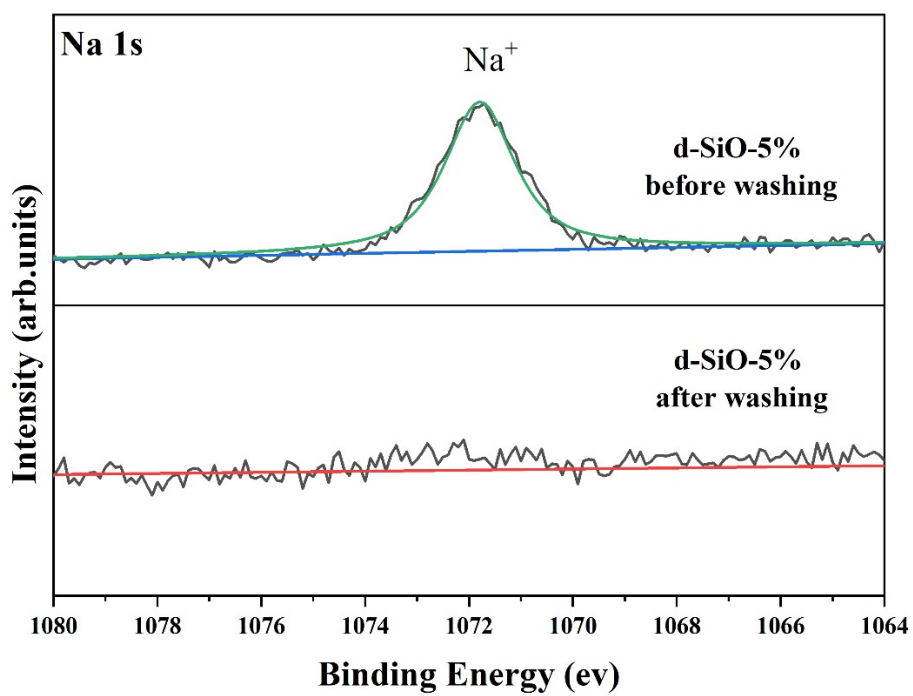

Fig. S3 XPS spectra of Na 1s before and after washing.

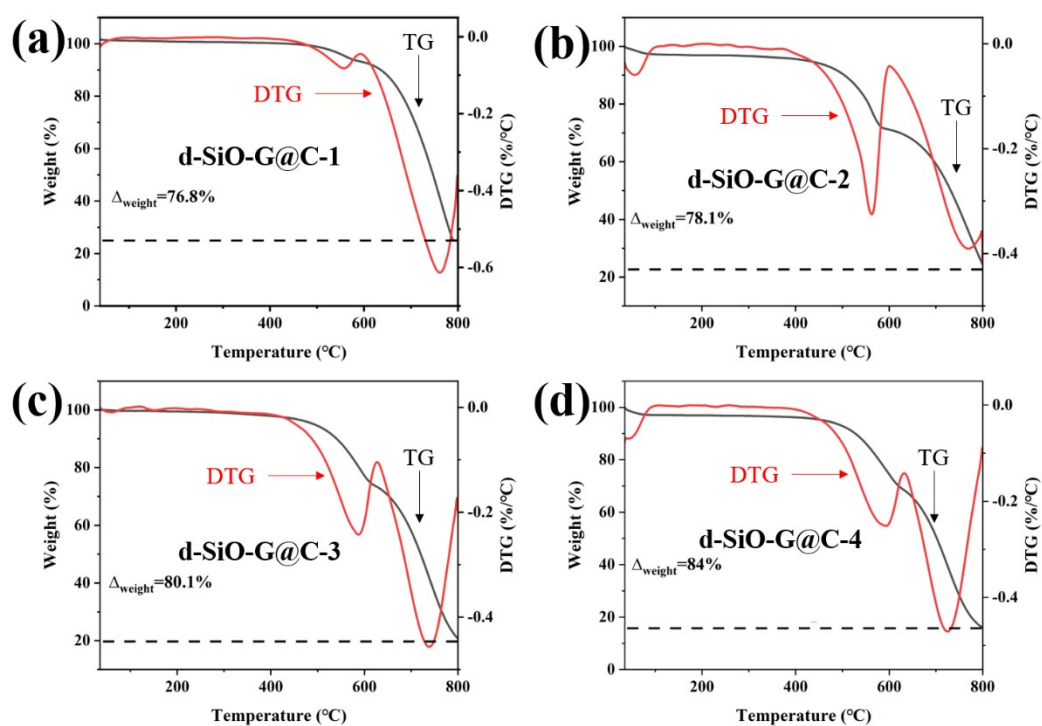

**Fig. S4** TG-DTG analysis curves of (a) d-SiO-G@C-1, (b) d-SiO-G@C-2, (c) d-SiO-G@C-3 and (d) d-SiO-G@C-4 composites in air.

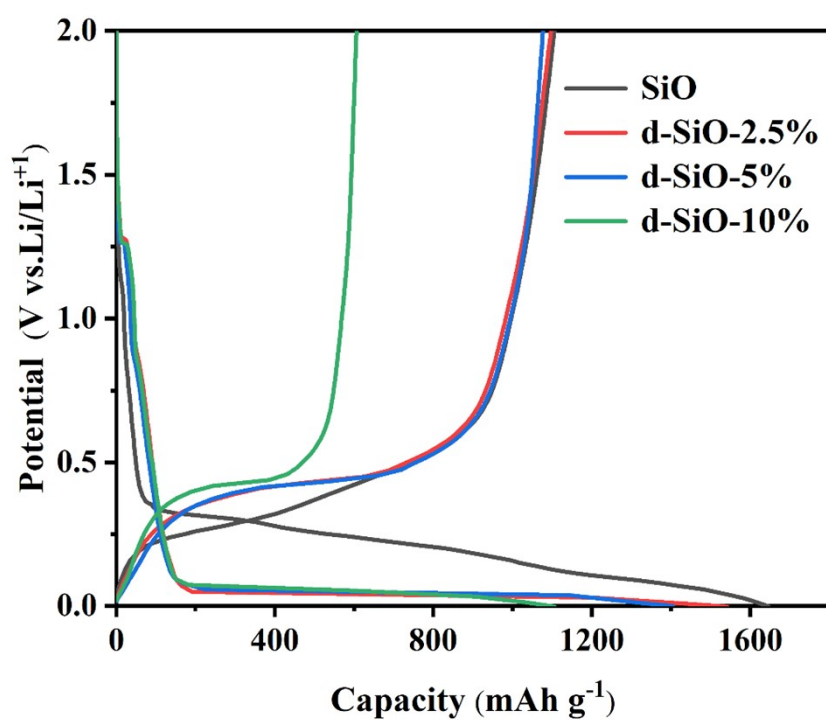

**Fig. S5** First charge/discharge curves of SiO materials with different amounts of  $\text{Na}_2\text{CO}_3$

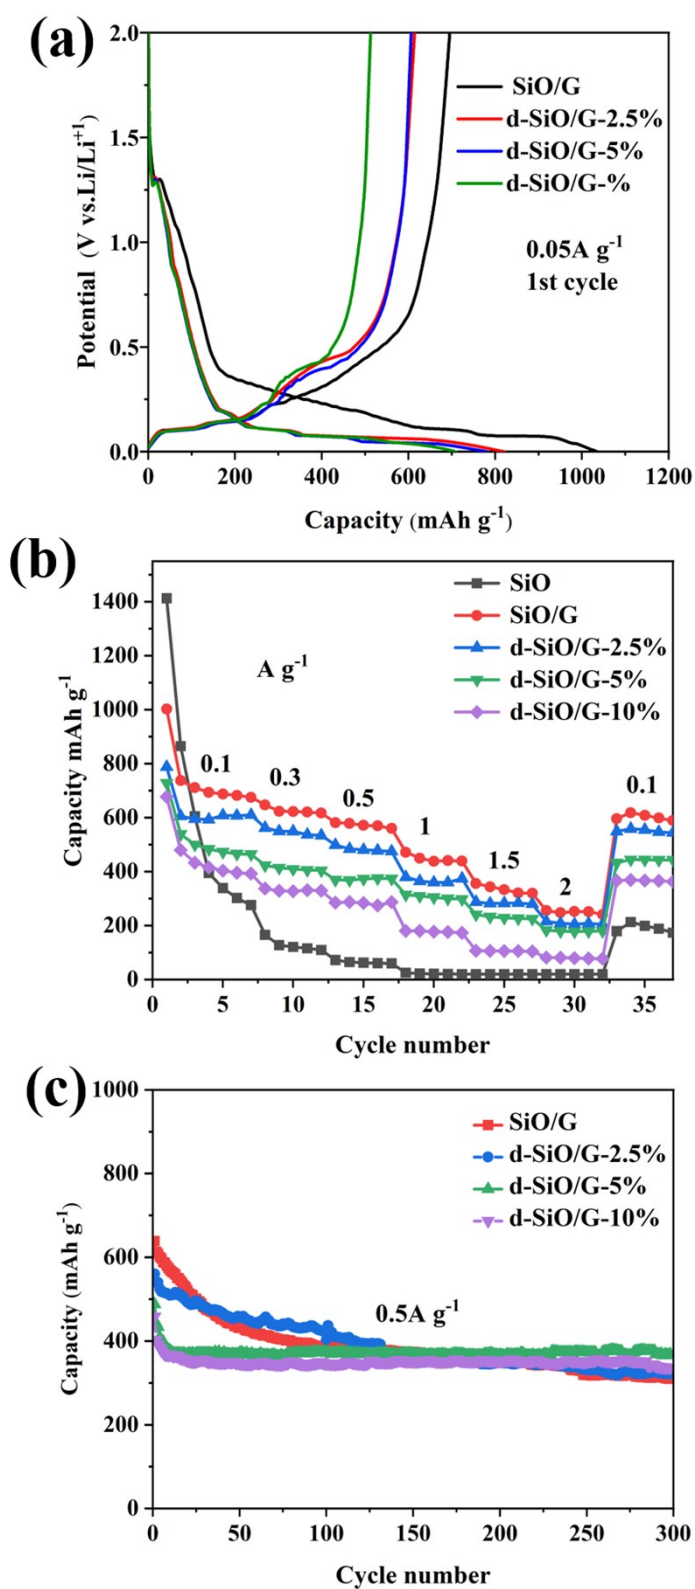

**Fig. S6** Electrochemical performances of SiO-G composites with different amounts of  $\text{Na}_2\text{CO}_3$  composites. (a) Charge and discharge curves of the first cycle, (b) Rate performance, (c) Cycling performance.

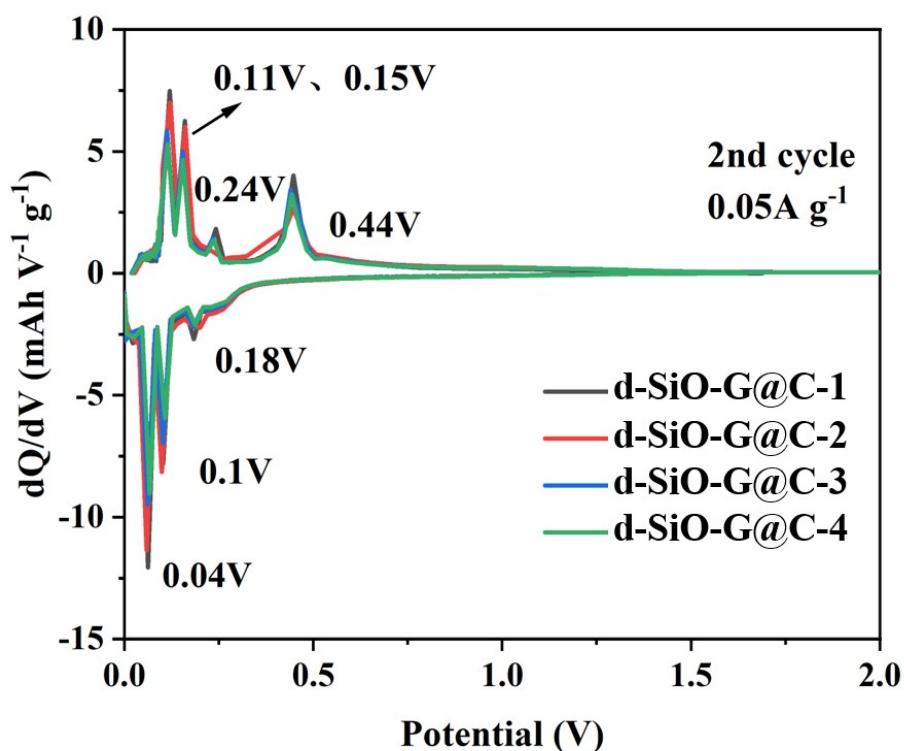

**Fig. S7**  $dQ/dV$  curves of d-SiO-G@C composites during the second cycles.

**Table S1** Peak areas of different oxidation states of Si from the Si 2p XPS of d-SiO-G-x composites

| sample       | Si <sup>0</sup> | Si <sup>1+</sup> | Si <sup>2+</sup> | Si <sup>3+</sup> | Si <sup>4+</sup> |
|--------------|-----------------|------------------|------------------|------------------|------------------|
| d-SiO-G-2.5% | 7%              | 10.8%            | 17.5%            | 37.2%            | 27.5%            |
| d-SiO-G-5%   | 9.2%            | 9%               | 16.6%            | 27.1%            | 38.1%            |
| d-SiO-G-10%  | 4.7%            | 7.3%             | 15.7%            | 25.8%            | 46.5%            |

**Table S2** Determination of silicon ions content in different solutions by ICP-OES method

| sample      | The Si ion content in the supernatant (mg L <sup>-1</sup> ) |
|-------------|-------------------------------------------------------------|
| DI Water    | <0.1                                                        |
| d-SiO-G-5%  | 0.69                                                        |
| d-SiO-G-10% | 1.19                                                        |

**Table S3** Initial specific charge/discharge capacities and ICE of commercial SiO material and d-SiO<sub>x</sub> composites

| sample     | Specific capacity of first charge (mAh g <sup>-1</sup> ) | Specific capacity of the first discharge (mAh g <sup>-1</sup> ) | ICE   |
|------------|----------------------------------------------------------|-----------------------------------------------------------------|-------|
| SiO        | 1105.8                                                   | 1646.2                                                          | 63.1% |
| d-SiO-2.5% | 1096.7                                                   | 1541.7                                                          | 71.1% |
| d-SiO-5%   | 1076.5                                                   | 1404.5                                                          | 76.6% |
| d-SiO-10%  | 605.8                                                    | 1106.0                                                          | 54.8% |

**Table S4** Initial specific charge/discharge capacities and ICE of SiO-G and d-SiO-G composites

| sample       | Initial specific charge capacity (mAh g <sup>-1</sup> ) | Initial specific discharge capacity (mAh g <sup>-1</sup> ) | ICE   |
|--------------|---------------------------------------------------------|------------------------------------------------------------|-------|
| SiO-G        | 695.2                                                   | 1033.9                                                     | 67.2% |
| d-SiO-G-2.5% | 614.1                                                   | 822.3                                                      | 74.7% |
| d-SiO-G-5%   | 606.3                                                   | 781.6                                                      | 77.6% |
| d-SiO-G-10%  | 512.9                                                   | 710.4                                                      | 72.2% |

**Table S5** Initial specific charge/discharge capacities and ICE of d-SiO-G-5% and d-SiO-G@C composites

| Sample      | Initial specific charging capacity (mAh g <sup>-1</sup> ) | Initial specific discharge capacity (mAh g <sup>-1</sup> ) | ICE   |
|-------------|-----------------------------------------------------------|------------------------------------------------------------|-------|
| d-SiO-G-5%  | 610.3                                                     | 810.6                                                      | 75.3% |
| d-SiO-G@C-1 | 581.9                                                     | 807.8                                                      | 72.0% |
| d-SiO-G@C-2 | 575.6                                                     | 795.0                                                      | 72.2% |
| d-SiO-G@C-3 | 563.4                                                     | 775.9                                                      | 72.6% |

|             |       |       |       |
|-------------|-------|-------|-------|
| d-SiO-G@C-4 | 548.3 | 774.3 | 70.8% |
|-------------|-------|-------|-------|

**Table S6** EIS curves of d-SiO-G-5% and d-SiO-G@C-3 at the 3rd and 300th cycle.

| Cycle           | d-SiO-G-5% |       | d-SiO-G@C-3 |       |
|-----------------|------------|-------|-------------|-------|
|                 | 3rd        | 300th | 3rd         | 300th |
| $R_f/\Omega$    | 5.23       | 7.98  | 5.44        | 6.36  |
| $R_{ct}/\Omega$ | 32.05      | 58.87 | 30.18       | 45.42 |
| $R_S$           | 3.18       | 7.03  | 0.45        | 5.8   |
| $R_W$           | 3.18       | 2.94  | 2.93        | 2.69  |
